# Supplementary material for: Highly water-soluble arene-ruthenium(ii) complexes: application to catalytic isomerization of allylic alcohols in aqueous medium
Source: Royal Society of Chemistry journal article supplement (doi:10.1039/b914789f), 2009-01-01
Supplement: b914789f.pdf [file b914789f.pdf]

## Supporting Information

### Highly water-soluble arene-ruthenium(II) complexes: application to catalytic isomerization of allylic alcohols in aqueous medium.

Beatriz Lastra-Barreira, Josefina Díez, Pascale Crochet\*

*Departamento de Química Orgánica e Inorgánica, Instituto Universitario de Química Organometálica “Enrique Moles” (Unidad Asociada al CSIC), Facultad de Química, Universidad de Oviedo, E-33071 Oviedo, Spain. Fax: (+34)-985 10 34 46, e-mail: [crochetpascale@uniovi.es](mailto:crochetpascale@uniovi.es).*

**1. Preparation and characterization of  $[\text{RuCl}_2(\eta^6\text{-}p\text{-cymene})\{\text{P}(\text{O}^i\text{Pr})_3\}]$ , **3c**.** A solution of the dimer  $[\{\text{RuCl}(\mu\text{-Cl})(\eta^6\text{-}p\text{-cymene})\}_2]$  (0.175 g, 0.300 mmol) and  $\text{P}(\text{O}^i\text{Pr})_3$  (205  $\mu\text{L}$ , 0.838 mmol) in 25 ml of  $\text{CH}_2\text{Cl}_2$  was stirred for 1 h at room temperature. After evaporation to dryness, the resultant residue was washed with a 3:1 mixture of hexane:diethyl ether (5 x 30 ml) and dried in vacuo, affording **3c** as a red solid. Yield: 0.217 g (72%).  $^{31}\text{P}\{^1\text{H}\}$  NMR,  $\text{CDCl}_3$ ,  $\delta$ : 107.5 (s).  $^1\text{H}$  NMR,  $\text{CDCl}_3$ ,  $\delta$ : 5.49 and 5.35 (both d, 2 H each,  $^3J_{\text{HH}} = 5.9$ , CH, cymene), 4.90-4.82 (m, 3 H,  $\text{OCHMe}_2$ ), 2.87 (sept, 1 H,  $^3J_{\text{HH}} = 6.9$ ,  $\text{CHMe}_2$ , cymene), 2.12 (s, 3 H, Me, cymene), 1.30 (d, 18 H,  $^3J_{\text{HH}} = 6.2$ ,  $\text{OCHMe}_2$ ), 1.24 (d, 6 H,  $^3J_{\text{HH}} = 6.9$ ,  $\text{CHMe}_2$ , cymene).  $^{13}\text{C}\{^1\text{H}\}$  NMR,  $\text{CDCl}_3$ ,  $\delta$ : 107.7 (s, C of cymene), 100.9 (s, C of cymene), 88.8 (d,  $^2J_{\text{PC}} = 3.2$  CH of cymene), 88.7 (d,  $^2J_{\text{PC}} = 2.4$ , CH of cymene), 71.1 (d,  $^2J_{\text{PC}} = 7.2$ ,  $\text{OCHMe}_2$ ), 30.4 (s,  $\text{CHMe}_2$ ), 23.8 (d,  $^3J_{\text{PC}} = 4.0$ ,  $\text{OCHMe}_2$ ), 21.8 (s,  $\text{CHMe}_2$ ), 17.9 (s, Me of cymene). Anal. Calcd for  $\text{C}_{19}\text{H}_{35}\text{Cl}_2\text{O}_3\text{PRu}$ : C, 44.12; H, 7.01. Found: C, 44.36; H, 6.86.

**2. X-ray crystal structure determination of complexes 2a-b.** The most relevant crystallographic and refinement data are given in Tables S1 (**2a**) and S3 (**2b**). Selected bond distance and angle values are given in Tables S2 (**2a**) and S4 (**2b**). Diffraction data were recorded on a Nonius KappaCCD single crystal diffractometer using Mo-K $\alpha$  radiation ( $\lambda = 0.71073$  Å). The data were collected the oscillation method, with 1° oscillation and 80 s exposure time per frame, and a crystal-to-detector distance of 35 mm. The data collection strategy was calculated with the program Collect.<sup>1</sup> Data reduction and cell refinement were performed using the programs HKL Denzo and Scalepack.<sup>2</sup> Absorption correction was applied by means of SORTAV.<sup>3</sup>

The software package WINGX was used for space group determination, structure solution and refinement.<sup>4</sup> Crystal structures were solved by direct methods, using the program SIR-2004.<sup>5</sup> Anisotropic least-squares refinement was carried out with SHELXL-97.<sup>6</sup> All non-hydrogen atoms were anisotropically refined. For **2a**, the hydrogen atoms were geometrically placed riding on their parent atoms with isotropic displacement parameters set to 1.2 times the  $U_{eq}$  of the atoms to which they are attached (1.5 for methyl groups). For **2b**, the coordinates of H atoms were found from different Fourier maps, and included in a refinement with isotropic parameters. The function minimized was  $([\sum w(F_o^2 - F_c^2)/\sum w(F_o^2)]^{1/2})^2$  where  $w = 1/[\sigma^2(F_o^2) + (aP)^2 + bP]$  ( $a$  and  $b$  values are shown in Tables S1 and S3) with  $\sigma^2(F_o^2)$  from counting statistics and  $P = (\max(F_o^2, 0) + 2F_c^2)/3$ .

Atomic scattering factors were taken from the International Tables for X-ray Crystallography.<sup>7</sup> Geometrical calculations were made with PARST.<sup>8</sup> Crystallographic plots were made with PLATON.<sup>9</sup> Crystallographic data have been deposited with the Cambridge Crystallographic Data Centre as supplementary publication N° CCDC 728240 (**2a**) and 728241 (**2b**). The data can be obtained free of charge via <http://www.ccdc.cam.ac.uk/conts/retrieving.html>.

**Table S1.** Crystal data and structure refinement for **2a**.

---

|                                 |                                                                    |                |
|---------------------------------|--------------------------------------------------------------------|----------------|
| Empirical formula               | C <sub>11</sub> H <sub>19</sub> Cl <sub>2</sub> O <sub>5</sub> PRu |                |
| Formula weight                  | 434.20                                                             |                |
| Temperature                     | 293(2) K                                                           |                |
| Wavelength                      | 0.71073 Å                                                          |                |
| Crystal system                  | Triclinic                                                          |                |
| Space group                     | P-1                                                                |                |
| Unit Cell dimensions            | a = 6.9850(6) Å                                                    | α = 80.825(4)° |
|                                 | b = 7.3150(6) Å                                                    | β = 81.027(4)° |
|                                 | c = 16.9400(16) Å                                                  | γ = 63.636(5)° |
| Volume                          | 762.05(12) Å <sup>3</sup>                                          |                |
| Z                               | 2                                                                  |                |
| Density (calculated)            | 1.892 g/cm <sup>3</sup>                                            |                |
| F(000)                          | 436                                                                |                |
| Crystal size                    | 0.1 x 0.10 x 0.05 mm <sup>3</sup>                                  |                |
| Theta range for data collection | 2.45-25.38                                                         |                |
| Reflections collected           | 9619                                                               |                |
| Independent reflections         | 2771                                                               |                |
| Weight function (a, b)          | 0.0586, 0                                                          |                |
| Final R indices [I > 2σ(I)]     | R1 = 0.0364, wR2 = 0.0948                                          |                |
| R indices (all data)            | R1 = 0.0460, wR2 = 0.0991                                          |                |

---

**Table S2:** Selected bond distance and angle values for **2a**.

| Bond distances (Å) |            | Bond angles (°) |           |
|--------------------|------------|-----------------|-----------|
| Ru-Cl(1)           | 2.4145(10) | C*-Ru-Cl(1)     | 122.41(3) |
| Ru-Cl(2)           | 2.4024(11) | C*-Ru-Cl(2)     | 125.79(3) |
| Ru-P               | 2.2948(12) | C*-Ru-P         | 130.60(3) |
| Ru-C*              | 1.7330(4)  | Cl(1)-Ru-Cl(2)  | 88.86(4)  |
| C(6)-O(1)          | 1.345(5)   | Cl(1)-Ru-P      | 90.53(4)  |
|                    |            | Cl(2)-Ru-P      | 86.18(4)  |
|                    |            | C(6)-O(1)-C(7)  | 117.8(3)  |

  

| Torsion angles      |         |
|---------------------|---------|
| C(1)-C(6)-O(1)-C(7) | -1.9(6) |

C\* = centroid of the arene ring (C(1), C(2), C(3), C(4), C(5) and C(6) carbon atoms).

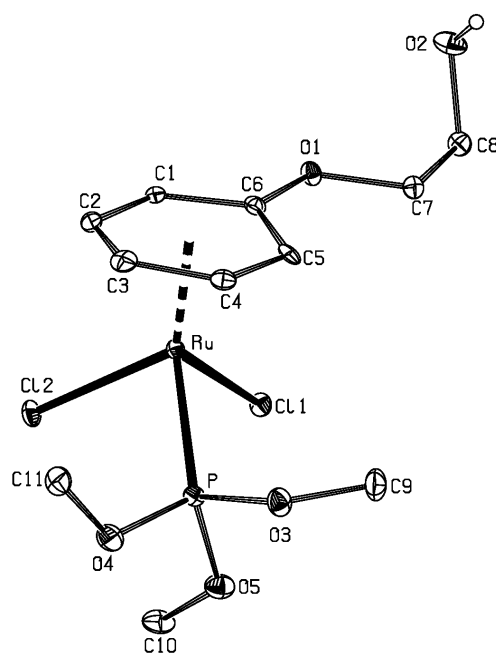

**Figure S1.** ORTEP type view of the structure of  $[\text{RuCl}_2(\eta^6\text{-C}_6\text{H}_5\text{OCH}_2\text{CH}_2\text{OH})\{\text{P}(\text{OMe})_3\}]$  (**2a**). Hydrogen atoms, except OH one, are omitted for clarity. Thermal ellipsoids are drawn at 20% probability level.

**Table S3.** Crystal data and structure refinement for **2b**.

---

|                                 |                                                                    |                 |
|---------------------------------|--------------------------------------------------------------------|-----------------|
| Empirical formula               | C <sub>14</sub> H <sub>25</sub> Cl <sub>2</sub> O <sub>5</sub> PRu |                 |
| Formula weight                  | 476.28                                                             |                 |
| Temperature                     | 150(2) K                                                           |                 |
| Wavelength                      | 0.71073 Å                                                          |                 |
| Crystal system                  | Monoclinic                                                         |                 |
| Space group                     | P2 <sub>1</sub> /c                                                 |                 |
| Unit Cell dimensions            | a = 7.6034(1) Å                                                    | α = 90°         |
|                                 | b = 14.0769(2) Å                                                   | β = 109.371(1)° |
|                                 | c = 18.3180(3) Å                                                   | γ = 90°         |
| Volume                          | 1849.63(5) Å <sup>3</sup>                                          |                 |
| Z                               | 4                                                                  |                 |
| Density (calculated)            | 1.710 g/cm <sup>3</sup>                                            |                 |
| F(000)                          | 968                                                                |                 |
| Crystal size                    | 0.5 x 0.15 x 0.1 mm <sup>3</sup>                                   |                 |
| Theta range for data collection | 1.87-25.23                                                         |                 |
| Reflections collected           | 9264                                                               |                 |
| Independent reflections         | 3301                                                               |                 |
| Weight function (a, b)          | 0.0676, 1.1315                                                     |                 |
| Final R indices [I > 2σ(I)]     | R1 = 0.0307, wR2 = 0.0861                                          |                 |
| R indices (all data)            | R1 = 0.0379, wR2 = 0.1162                                          |                 |

---

**Table S4:** Selected bond distance and angle values for **2b**.

---

| <b>Bond distances (Å)</b> |           | <b>Bond angles (°)</b> |           |
|---------------------------|-----------|------------------------|-----------|
| Ru-Cl(1)                  | 2.4128(8) | C*-Ru-Cl(1)            | 124.61(2) |
| Ru-Cl(2)                  | 2.4061(8) | C*-Ru-Cl(2)            | 124.24(2) |
| Ru-P                      | 2.2786(9) | C*-Ru-P                | 129.80(2) |
| Ru-C*                     | 1.7181(2) | Cl(1)-Ru-Cl(2)         | 87.34(3)  |
| C(6)-O(1)                 | 1.338(4)  | Cl(1)-Ru-P             | 87.79(3)  |
|                           |           | Cl(2)-Ru-P             | 90.44(3)  |
|                           |           | C(6)-O(1)-C(7)         | 121.4(3)  |

**Torsion angles**

|                     |        |
|---------------------|--------|
| C(1)-C(6)-O(1)-C(7) | 2.1(5) |
|---------------------|--------|

---

C\* = centroid of the arene ring (C(1), C(2), C(3), C(4), C(5) and C(6) carbon atoms).

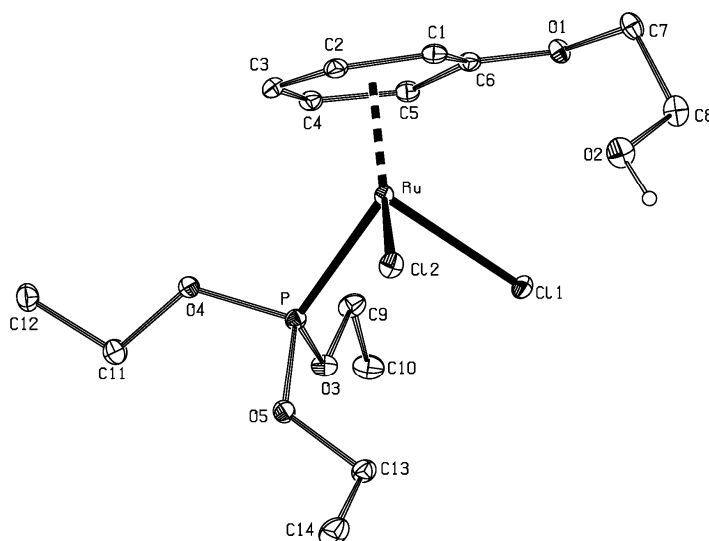

**Figure S2.** ORTEP type view of the structure of  $[\text{RuCl}_2(\eta^6\text{-C}_6\text{H}_5\text{OCH}_2\text{CH}_2\text{OH})\{\text{P}(\text{OEt})_3\}]$  (**2b**).

Hydrogen atoms, except OH one, are omitted for clarity. Thermal ellipsoids are drawn at 20% probability level.

### 3. Behavior of complexes 2a-c in water.

When complexes  $[\text{RuCl}_2(\eta^6\text{-C}_6\text{H}_5\text{OCH}_2\text{CH}_2\text{OH})\{\text{P}(\text{OR})_3\}]$  (R = Me (**2a**), Et (**2b**), <sup>i</sup>Pr (**2c**)) were dissolved in D<sub>2</sub>O a mixture of  $[\text{RuCl}_2(\eta^6\text{-C}_6\text{H}_5\text{OCH}_2\text{CH}_2\text{OH})\{\text{P}(\text{OR})_3\}]$  and  $[\text{RuCl}(\text{H}_2\text{O})(\eta^6\text{-C}_6\text{H}_5\text{OCH}_2\text{CH}_2\text{OH})\{\text{P}(\text{OR})_3\}][\text{Cl}]$  is observed by NMR spectroscopy.

*Characterization of  $[\text{RuCl}_2(\eta^6\text{-C}_6\text{H}_5\text{OCH}_2\text{CH}_2\text{OH})\{\text{P}(\text{OMe})_3\}]$  (**2a**) and  $[\text{RuCl}(\text{H}_2\text{O})(\eta^6\text{-C}_6\text{H}_5\text{OCH}_2\text{CH}_2\text{OH})\{\text{P}(\text{OMe})_3\}][\text{Cl}]$  (**2a'**) in water.* Data for **2a**: <sup>31</sup>P{<sup>1</sup>H} NMR, D<sub>2</sub>O,  $\delta$ : 125.3 (s). <sup>1</sup>H NMR, D<sub>2</sub>O,  $\delta$ : 6.55 (m, 2 H, CH<sub>meta</sub>), 6.02 (d, 2 H, <sup>3</sup>J<sub>HH</sub> = 5.7, CH<sub>ortho</sub>), 5.68 (t, 1 H, <sup>3</sup>J<sub>HH</sub> = 5.3, CH<sub>para</sub>), 4.71 (m, 2 H, OCH<sub>2</sub>), 4.36 (m, 2 H, OCH<sub>2</sub>), 4.16 (d, 9 H, <sup>3</sup>J<sub>PH</sub> = 11.4, Me). Data for **2a'**: <sup>31</sup>P{<sup>1</sup>H} NMR, D<sub>2</sub>O,  $\delta$ : 123.9 (s). <sup>1</sup>H NMR, D<sub>2</sub>O,  $\delta$ : 6.28 (t, 1 H, <sup>3</sup>J<sub>HH</sub> = 5.9, CH<sub>para</sub>), 6.18 (m, 1 H, CH<sub>ortho</sub>), 6.01 (d, 1 H, <sup>3</sup>J<sub>HH</sub> = 6.5, CH<sub>ortho</sub>), 5.43 (m, 2 H, CH<sub>meta</sub>), 4.38 (m, 2 H, OCH<sub>2</sub>), 4.03 (m, 2 H, OCH<sub>2</sub>), 3.84 (m, 9 H, Me). Molar conductivity in water:  $\Lambda_M = 79 \text{ } \Omega \cdot \text{cm}^2 \cdot \text{mol}^{-1}$ .

*Characterization of  $[\text{RuCl}_2(\eta^6\text{-C}_6\text{H}_5\text{OCH}_2\text{CH}_2\text{OH})\{\text{P}(\text{OEt})_3\}]$  (**2b**) and  $[\text{RuCl}(\text{H}_2\text{O})(\eta^6\text{-C}_6\text{H}_5\text{OCH}_2\text{CH}_2\text{OH})\{\text{P}(\text{OEt})_3\}][\text{Cl}]$  (**2b'**) in water.* Data for **2b**: <sup>31</sup>P{<sup>1</sup>H} NMR, D<sub>2</sub>O,  $\delta$ : 118.0 (s). <sup>1</sup>H NMR, D<sub>2</sub>O,  $\delta$ : 6.12 (broad s, 2 H, CH<sub>meta</sub>), 5.58 (broad s, 2 H, CH<sub>ortho</sub>), 5.22 (broad s, 1 H, CH<sub>para</sub>), 4.35 (broad s, 2 H, OCH<sub>2</sub>), 4.15 (m, 6 H, CH<sub>2</sub>Me), 4.00 (broad s, 2 H, OCH<sub>2</sub>), 1.35 (t, 9 H, <sup>3</sup>J<sub>HH</sub> = 6.2, Me). Data for **2b'**: <sup>31</sup>P{<sup>1</sup>H} NMR, D<sub>2</sub>O,  $\delta$ : 117.4 (s). <sup>1</sup>H NMR, D<sub>2</sub>O,  $\delta$ : 6.12 (m, 1 H, CH<sub>meta</sub>), 6.00 (m, 1 H, CH<sub>meta</sub>), 5.84 (dt, 1 H, <sup>3</sup>J<sub>HH</sub> = 6.4, <sup>4</sup>J<sub>HH</sub> = 2.0, CH<sub>ortho</sub>), 5.27 (dd, 1 H, <sup>3</sup>J<sub>HH</sub> = 6.4, <sup>4</sup>J<sub>PH</sub> = 2.0, CH<sub>ortho</sub>), 5.23 (t, 1 H, <sup>3</sup>J<sub>HH</sub> = 5.2, CH<sub>para</sub>), 4.26 (t, 2 H, <sup>3</sup>J<sub>HH</sub> = 3.6, OCH<sub>2</sub>), 4.07 (dq, 6 H, <sup>3</sup>J<sub>PH</sub> = 14.4, <sup>3</sup>J<sub>HH</sub> = 6.8, CH<sub>2</sub>Me), 3.90 (m, 2 H, OCH<sub>2</sub>), 1.24 (dt, 9 H, <sup>4</sup>J<sub>PH</sub> = <sup>3</sup>J<sub>HH</sub> = 6.8, CH<sub>2</sub>Me). Molar conductivity in water:  $\Lambda_M = 74 \text{ } \Omega \cdot \text{cm}^2 \cdot \text{mol}^{-1}$ .

**Characterization of  $[\text{RuCl}_2(\eta^6\text{-C}_6\text{H}_5\text{OCH}_2\text{CH}_2\text{OH})\{\text{P}(\text{O}^i\text{Pr})_3\}]$  (**2c**) and  $[\text{RuCl}(\text{H}_2\text{O})(\eta^6\text{-C}_6\text{H}_5\text{OCH}_2\text{CH}_2\text{OH})\{\text{P}(\text{O}^i\text{Pr})_3\}][\text{Cl}]$  (**2c'**) in water.** Data for **2c**:  $^{31}\text{P}\{^1\text{H}\}$  NMR,  $\text{D}_2\text{O}$ ,  $\delta$ : 111.5 (s).  $^1\text{H}$  NMR,  $\text{D}_2\text{O}$ ,  $\delta$ : 6.08 (m, 2 H,  $\text{CH}_{\text{meta}}$ ), 5.37 (d, 2 H,  $^3J_{\text{HH}} = 4.8$ ,  $\text{CH}_{\text{ortho}}$ ), 5.00 (t, 1 H,  $^3J_{\text{HH}} = 5.2$ ,  $\text{CH}_{\text{para}}$ ), 4.66 (m, 3 H,  $\text{CHMe}_2$ ), 4.22 (m, 2 H,  $\text{OCH}_2$ ), 3.90 (m, 2 H,  $\text{OCH}_2$ ), 1.27 (m, 18 H,  $\text{CHMe}_2$ ). Data for **2c'**:  $^{31}\text{P}\{^1\text{H}\}$  NMR,  $\text{D}_2\text{O}$ ,  $\delta$ : 111.2 (s).  $^1\text{H}$  NMR,  $\text{D}_2\text{O}$ ,  $\delta$ : 6.01 (m, 1 H,  $\text{CH}_{\text{meta}}$ ), 5.97 (m, 1 H,  $\text{CH}_{\text{meta}}$ ), 5.77 (d, 1 H,  $^3J_{\text{HH}} = 6.4$ ,  $\text{CH}_{\text{ortho}}$ ), 5.21 (d, 1 H,  $^3J_{\text{HH}} = 5.6$ ,  $\text{CH}_{\text{ortho}}$ ), 5.13 (t, 1 H,  $^3J_{\text{HH}} = 5.2$ ,  $\text{CH}_{\text{para}}$ ), 4.66 (m, 3 H,  $\text{CHMe}_2$ ), 4.25 (m, 2 H,  $\text{OCH}_2$ ), 3.90 (m, 2 H,  $\text{OCH}_2$ ), 1.29 (m, 18 H,  $\text{CHMe}_2$ ). Molar conductivity in water:  $\Lambda_{\text{M}} = 47 \text{ } \Omega \cdot \text{cm}^2 \cdot \text{mol}^{-1}$ .

**NMR spectra of **2b/2b'** in  $\text{D}_2\text{O}$ .**

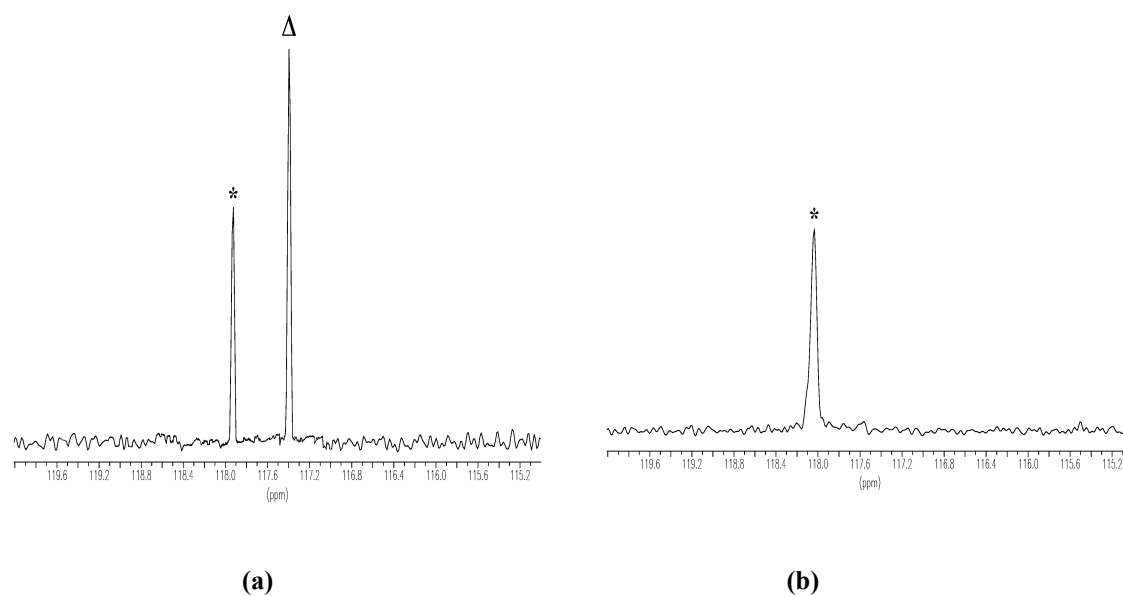

**Figure 1:**  $^{31}\text{P}\{^1\text{H}\}$  NMR of **2b** in  $\text{D}_2\text{O}$  without NaCl (part a) and with NaCl (part b). Signals due to  $[\text{RuCl}_2(\eta^6\text{-C}_6\text{H}_5\text{OCH}_2\text{CH}_2\text{OH})\{\text{P}(\text{OEt})_3\}]$  (**2b**) and  $[\text{RuCl}(\text{H}_2\text{O})(\eta^6\text{-C}_6\text{H}_5\text{OCH}_2\text{CH}_2\text{OH})\{\text{P}(\text{OEt})_3\}][\text{Cl}]$  (**2b'**) are indicated with \* y  $\Delta$ , respectively.



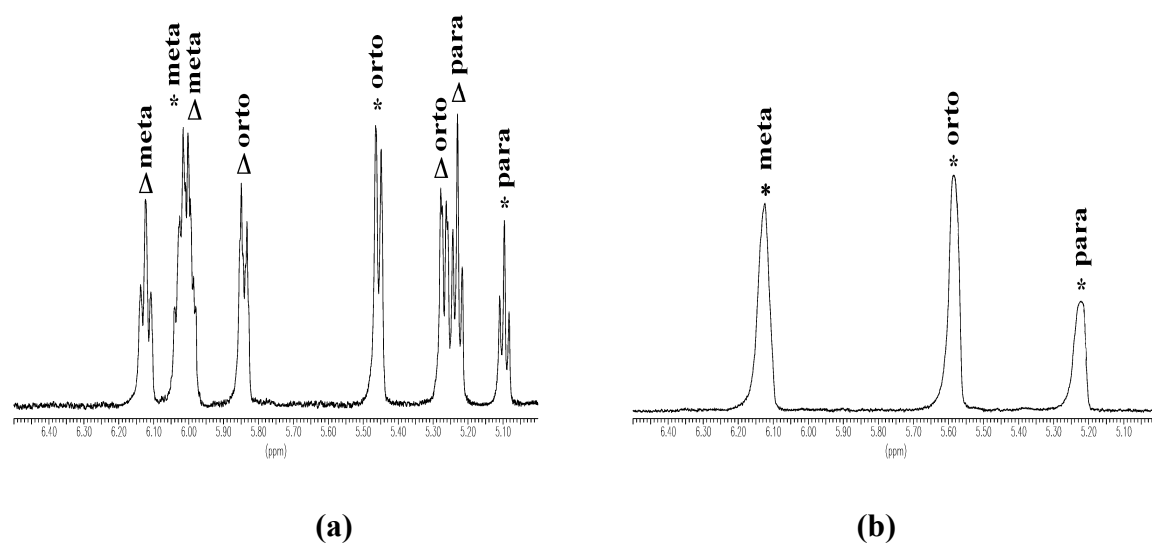

**Figure 2:** Detail of  $^1\text{H}$  NMR of **2b** in  $\text{D}_2\text{O}$  without NaCl (part a) and with NaCl (part b). Signals due to  $[\text{RuCl}_2(\eta^6\text{-C}_6\text{H}_5\text{OCH}_2\text{CH}_2\text{OH})\{\text{P}(\text{OEt})_3\}]$  (**2b**) and  $[\text{RuCl}(\text{H}_2\text{O})(\eta^6\text{-C}_6\text{H}_5\text{OCH}_2\text{CH}_2\text{OH})\{\text{P}(\text{OEt})_3\}][\text{Cl}]$  (**2b'**) are indicated with \* y  $\Delta$ , respectively.

#### 4. Catalytic redox isomerization of allylic alcohols in THF.

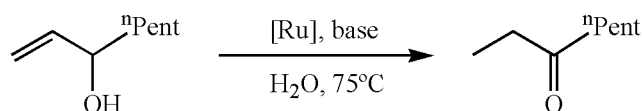

**Table S5.** Isomerization of 1-octen-3-ol into 3-octanone catalyzed by complexes  $[\text{RuCl}_2(\eta^6\text{-C}_6\text{H}_5\text{OCH}_2\text{CH}_2\text{OH})(\text{L})]$  (**2a-e**).<sup>a</sup>

| Catalyst [L]                                  | Time   | Yield (%) <sup>b</sup> | TOF ( $\text{h}^{-1}$ ) <sup>c</sup> |
|-----------------------------------------------|--------|------------------------|--------------------------------------|
| <b>2a</b> $[\text{P}(\text{OMe})_3]$          | 5 min  | > 99                   | 1200                                 |
| <b>2b</b> $[\text{P}(\text{OEt})_3]$          | 5 min  | > 99                   | 1200                                 |
| <b>2c</b> $[\text{P}(\text{O}^i\text{Pr})_3]$ | 5 min  | > 99                   | 1200                                 |
| <b>2d</b> $[\text{P}(\text{OPh})_3]$          | 4 h    | > 99                   | 25                                   |
| <b>2e</b> $[\text{PPh}_3]$                    | 20 min | > 99                   | 300                                  |

<sup>a</sup> Reactions carried out at  $75^\circ\text{C}$  using 4 mmol of 1-octen-3-ol, 1 mol% of Ru, 5 mol% of  $\text{KO}^t\text{Bu}$  and 20 mL of THF. <sup>b</sup> Determined by GC analyses. <sup>c</sup> TOF = Turn Over Frequency, ((mol of product/mol of catalyst)/time), calculated at the time indicated in each case.

## References

- 1 *Collect*: data collection software, Bruker AXS, Delf, The Netherlands, 2004.
- 2 Z. Otwinowski, W. Minor, *Methods Enzymol.*, 1997, **276**, 307.
- 3 R. H. Blessing, *Acta Crystallogr., Sect. A*, 1995, **51**, 33.
- 4 L. J. Farrugia, *J. Appl. Crystallogr.*, 1999, **32**, 837.
- 5 M. C. Burla, R. Caliandro, M. Camalli, B. Carrozzini, G. L. Cascarano, L. De Caro, C. Giacovazzo, G. Polidori, R. Spagna, *SIR2004, J. Appl. Cryst.*, 2005, **38**, 381.
- 6 G. M. Sheldrick, *SHELXL97: Program for the refinement of Crystal Structures*, University of Göttingen, Göttingen, Germany, 1997.
- 7 *International Tables for X-ray Crystallography*, Kynoch Press, Birmingham, UK, 1974, Vol. IV (present distributor: Kluwer Academic Publishers, Dordrecht, The Netherlands).
- 8 M. Nardelli, *Comput. Chem.*, 1983, **7**, 95.
- 9 A. L. Spek, *PLATON: A multipurpose Crystallographic Tool*, University of Utrecht, The Netherlands, 2007.
